# Supplementary material for: In Pursuit of the Optimal City: Evaluation of Procedurally Generated City Layouts
Source: Research Square preprint supplement (doi:10.21203/rs.3.rs-7492997/v1), 2025-11-14
Supplement: Supplementary file 1 [file 5f3ab11b2c10c35e840de7ca.pdf]

# Supplementary Information - In Pursuit of the Optimal City: Evaluation of Procedurally Generated City Layouts

Cameron Dobbie<sup>1</sup> and Anders Johansson<sup>1\*</sup>

<sup>1\*</sup>School of Engineering Mathematics and Technology, University of  
Bristol, Queens Road, Bristol, BS8 1QU, United Kingdom.

\*Corresponding author(s). E-mail(s): [a.johansson@bristol.ac.uk](mailto:a.johansson@bristol.ac.uk);

## List of Tables

|   |                                                                            |   |
|---|----------------------------------------------------------------------------|---|
| 1 | The inputs and outputs for the <code>generateCity</code> function. . . . . | 4 |
| 2 | The parameters stored for node $i$ . . . . .                               | 5 |
| 3 | The parameters stored for edge $(i, j)$ . . . . .                          | 5 |
| 4 | Parameters defining each production rule. . . . .                          | 6 |

## List of Figures

|   |                                                                                                                                                                                                                                                                                                                                                                                                                                                                                              |   |
|---|----------------------------------------------------------------------------------------------------------------------------------------------------------------------------------------------------------------------------------------------------------------------------------------------------------------------------------------------------------------------------------------------------------------------------------------------------------------------------------------------|---|
| 1 | Diagram showing how the positions of new nodes are calculated. The <code>incEdge</code> shown is that of node $i$ , and is the line between $i$ and its parent, $\pi_i$ . $j_1$ is the first new node, and $d_1$ and $\theta_1$ are the corresponding distance and deflection angle respectively. Similarly for the second new node, $j_2$ . Note that in this case, $\theta_2$ will take a negative value, as the deflection angle is always measured in the anticlockwise direction. . . . | 5 |
| 2 | Diagram showing how check (1) turns a “bridge” into an intersection, to preserve the planar element of the city and also create a cycle. Edge $(i, j)$ intersects with two existing edges, as shown by the red dots. The position of potential node $j$ is therefore adjusted to the intersection which is closest to its parent $i$ . . . . .                                                                                                                                               | 8 |
| 3 | Diagram showing how check (2) prevents node overcrowding. When an existing node $k$ is within the <code>intersectRadius</code> of a potential new node $j$ , $j$ is not created and an edge is instead created from $i$ to $k$ . This <code>intersectRadius</code> is represented by the red circle. . . . .                                                                                                                                                                                 | 8 |

# 1 CitySprout Methodology

This section provides further detail on how CitySprout develops a city.

The full source code for CitySprout can be accessed in our open-source repository [1].

The `generateCity` function within the `CityGenerator` class is used to create the cities. The full list of inputs and output of this function are given in Table 1.

The generated cities, at all stages of their development, are stored as a `NetworkX` graph object [2]. This object type has been chosen because the `NetworkX` package allows for custom attribute types to be assigned to nodes. `NetworkX` also contains many graphical analysis algorithms which can be used to calculate metrics as discussed in the main paper.

`NetworkX` graphs are stored as a collection of nodes, and edges between them. In the case of CitySprout, each node and edge has a series of stored parameters which influence how the city expands. These parameters are described in Tables 2 and 3. Note that we will subsequently refer to the `roadType` and `nodeType` combination of a node as its “*RN* value”.

Before a city is generated, a single “grammar” is selected. Each of these grammars has a series of production rules, governing how (and if) nodes with different *RN* values will develop with each iteration.

Within the definition of any individual grammar, each possible *RN* value can have any number of associated production rules. These rules specify what will happen when the L-system is applied to an existing node *i*. These rules can change *i* to a different node type, and can create any number of new “children” nodes *j*, making *i* the “parent” of these nodes. The position of these children is also determined by the rule, which specifies both the angles of deflection from the `incEdge` of *i*, and also the distance between *i* and each child, *j*. The angles can be either a single value, or a list of two limits, between which a random value will be selected. If a child is created, an edge will also be created from the parent to the child. Figure 1 illustrates how these angles and distances are calculated.

If any *RN* value has 0 associated rules, any node *i* with this *RN* value will remain in the same state for all subsequent iterations, and no children nodes *j* will be created from it. If it has one production rule, this will be automatically applied to *i* during an iteration. If it has multiple rules, each rule must have an associated `occurProb` which governs how likely it is to be selected during an iteration. Each rule may also have a `minDistances` condition, which prevents a production rule from being selected if *i* is too close to any other node of a specific *RN* value. The handling of this will be discussed subsequently. This condition allows the network to follow a desired spatial distribution and avoid overcrowding. The full list of parameters for each production rule is shown in Table 4.

In order that the graphs can later be analysed as road networks, the edges are grouped into roads. To achieve this, each edge is assigned a “road number”, which is a unique identifier for each road. Each road consists of any number of connected edges. New edges are either added to existing roads or placed on a brand new road, according to the `newRoad` parameter of each production rule shown in Table 4.

**Table 1** The inputs and outputs for the `generateCity` function.

| Parameter       | Possible values                                                                                                                                               | Meaning                                                                                                             |
|-----------------|---------------------------------------------------------------------------------------------------------------------------------------------------------------|---------------------------------------------------------------------------------------------------------------------|
| <b>Inputs</b>   |                                                                                                                                                               |                                                                                                                     |
| grammar         | <code>grammars.Organic</code> , <code>grammars.Grid</code> ,<br><code>grammars.Hex</code> , <code>grammars.Line</code> (or other dict<br>of the correct form) | The grammar which will be used to generate the city                                                                 |
| seed            | Any int (default 42)                                                                                                                                          | The seed which will be used                                                                                         |
| intersectRadius | Any float (default 0.8)                                                                                                                                       | The minimum possible distance between nodes (any<br>nodes closer than this will be joined according to check<br>(2) |
| maxWidth        | Any float, None (default None)                                                                                                                                | The maximum width of the city                                                                                       |
| maxHeight       | Any float, None (default None)                                                                                                                                | The maximum height of the city                                                                                      |
| plotType        | "Map", "Animation", None (default "Map")                                                                                                                      | The plot type which will be shown                                                                                   |
| showNodes       | Any bool (default False)                                                                                                                                      | Whether or not a circle will be displayed at each node                                                              |
| nodeLabelType   | "Node Type", "Node Number", "Road<br>Number", None (default None)                                                                                             | The label type displayed at each node                                                                               |
| edgeLabelType   | "Edge Weight", "Road Number", None<br>(default None)                                                                                                          | The label type displayed at each edge                                                                               |
| complexityPath  | Any str representing a path, None (default<br>None)                                                                                                           | The path at which the complexity data will be stored                                                                |
| maxRoadSegments | Any float or int                                                                                                                                              | The maximum number of edges in the graph before<br>generation will stop                                             |
| maxRoadLength   | Any float or int                                                                                                                                              | The maximum length of road before generation will<br>stop (hm)                                                      |
| population      | Any float or int                                                                                                                                              | The maximum population of the city before generation<br>will stop                                                   |
| <b>Output</b>   |                                                                                                                                                               |                                                                                                                     |
| g               | NetworkX graph object                                                                                                                                         | The city's road network                                                                                             |

**Table 2** The parameters stored for node  $i$ .

| Parameter     | Meaning                                                                                                                                            |
|---------------|----------------------------------------------------------------------------------------------------------------------------------------------------|
| roadType      | m (main), l (large), or s (small): the type of road node that $i$ lies on                                                                          |
| nodeType      | start, L (leaf), T (twig), or B (branch): represents the stage of expansion of a node, i.e. starting node, yet to expand, finished expanding, etc. |
| pos           | The coordinates of node $i$                                                                                                                        |
| incEdge       | The direction vector of the edge between $i$ 's parent and $i$                                                                                     |
| incRoadNumber | The road number of the edge between $i$ 's parent and $i$                                                                                          |

**Table 3** The parameters stored for edge  $(i, j)$ .

| Parameter   | Meaning                                                                                                             |
|-------------|---------------------------------------------------------------------------------------------------------------------|
| weight      | Used only for plots. Unique to each roadType and used to plot different sized roads with different line thicknesses |
| boundaryBox | The axis-aligned boundary box of edge $(i, j)$                                                                      |
| roadNumber  | The road number of edge $(i, j)$                                                                                    |

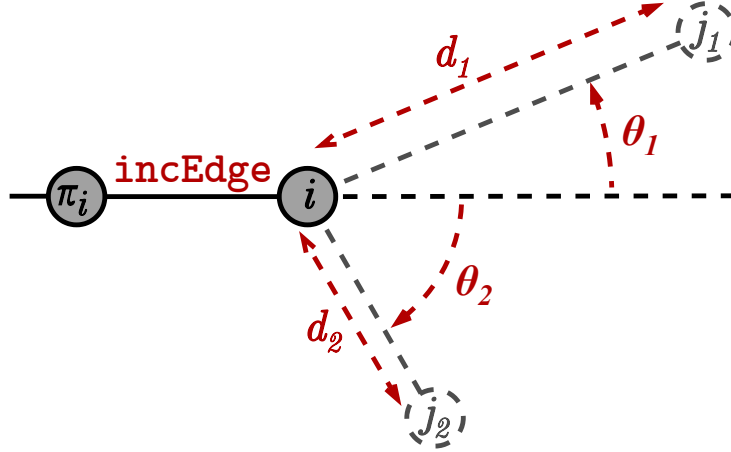

**Fig. 1** Diagram showing how the positions of new nodes are calculated. The **incEdge** shown is that of node  $i$ , and is the line between  $i$  and its parent,  $\pi_i$ .  $j_1$  is the first new node, and  $d_1$  and  $\theta_1$  are the corresponding distance and deflection angle respectively. Similarly for the second new node,  $j_2$ . Note that in this case,  $\theta_2$  will take a negative value, as the deflection angle is always measured in the anticlockwise direction.

**Table 4** Parameters defining each production rule.

| Parameter                  | Data type | Meaning                                                                                                                                                                                                                                                      |
|----------------------------|-----------|--------------------------------------------------------------------------------------------------------------------------------------------------------------------------------------------------------------------------------------------------------------|
| occurProb                  | float     | The relative probability of this rule being chosen. Used when there are multiple possible production rules for the same $RN$ value.                                                                                                                          |
| changeNodeTo               | str       | Node type to change node to after expansion. This allows nodes to expand only once, rather than every iteration. Possible values shown in Table 2.                                                                                                           |
| thetas <sup>1</sup>        | float     | Angle of deflection of new edge from expanding node's <b>incEdge</b> . See Figure 1.                                                                                                                                                                         |
| randDirection <sup>1</sup> | bool      | <b>True</b> means the angle of deflection has a 50% chance to change sign.                                                                                                                                                                                   |
| lengths <sup>1</sup>       | float     | The distance between the expanding node and the child node(s) (before any checks are performed). See Figure 1.                                                                                                                                               |
| newRoadTypes <sup>1</sup>  | str       | The road type of the child node(s). Possible values shown in Table 2.                                                                                                                                                                                        |
| newNodeTypes <sup>1</sup>  | str       | The node type of the child node(s). Possible values shown in Table 2.                                                                                                                                                                                        |
| newRoad <sup>1</sup>       | bool      | <b>True</b> means the new edge(s) will lie on a brand new road. <b>False</b> means the new edge(s) will lie on the same road as the expanding node's incoming edge.                                                                                          |
| minDistances <sup>1</sup>  | dict      | A dictionary of $RN$ values and the minimum allowed distance between the expanding node and a node of the corresponding $RN$ value. If there is a node of the given $RN$ value too close to the expanding node, another rule will be selected (if possible). |

<sup>1</sup>These parameters can also be a list of values, with all of these lists being the same length, corresponding to the number of nodes created. The first value in each list is for the first child node, and so on. This allows for nodes to expand into multiple nodes rather than just one.

When the `generateCity` function is called, a single node with a `roadType` of `m` and a `nodeType` of `start` is created at position  $(0, 0)$ . The following algorithm is then applied to this node,  $i$ :

1. Check the `RN` value of node  $i$
2. Check the production rules for this `RN` value. If no production rule exists, leave the node unchanged and skip the remaining steps. If one production rule exists, select it. If multiple production rules exist, randomly select one based on their `occurProbs`.
3. Check if the `minDistances` condition for this production rule is satisfied. If not, randomly select another production rule for this `RN` value (if possible). Continue searching for a rule until the `minDistances` condition of the selected rule is satisfied
4. Change node type of  $i$  according to the production rule
5. Check if production rule requires generation of child nodes  $j$
6. For potential positions of any child nodes  $j$ , perform checks (1) and (2)
7. Place any new nodes and/or edges, and calculate and store their parameter values

Note that it is important that for each `RN` value, there is at least one rule that has no `minDistances` condition. Otherwise, during step 3, it is possible that no rule will be found where this condition is satisfied. In this case, a random rule will be selected regardless of its `minDistances` condition. This may lead to unexpected behaviour.

The initial iteration will create a certain number of new nodes and edges.

Another iteration is then applied to this updated graph. Each iteration involves applying the above algorithm to every node in the current graph.

The network expansion will continue until one of the stopping conditions is met. These conditions are input when the `generateCity` function is called, and can be any combination of: a maximum number of iterations, a maximum number of edges, a maximum total road length, and a maximum population. If multiple stopping conditions are selected, the generation will stop as soon as any of these are met.

Checks (1) and (2), described in step 6 of the algorithm, ensure the graph is cyclic and that the desired spatial distribution of nodes is achieved. They work as follows:

Check (1) ensures that the potential new edge  $(i, j)$  being created between existing node  $i$  and the potential new node  $j$  does not cross over an existing edge. If it does, the position of  $j$  will be updated to this intersection point.

If  $(i, j)$  crosses over several existing edges, the new node  $j$  is placed at whichever of these intersections is closest to the parent node  $i$ . The workings of Check (1) are shown in Figure 2.

This check is performed by first looking at every existing edge, and creating a subset of these in which each edge has an axis-aligned bounding box that intersects with the bounding box of the potential new edge  $(i, j)$ . Any edge which is not in this subset cannot possibly intersect with  $(i, j)$ , as shown by the proof in Section 2. For each of these potential edges in the subset, CitySprout calculates the intersection point of this edge and the infinite line which is the extension of  $(i, j)$ . If this intersection point falls on line segment  $(i, j)$ , the location of this intersection point is recorded. If the intersection point does not lie on  $(i, j)$ , it is disregarded. Once all potential edges in the subset have been checked, the intersection closest to  $i$  is determined by

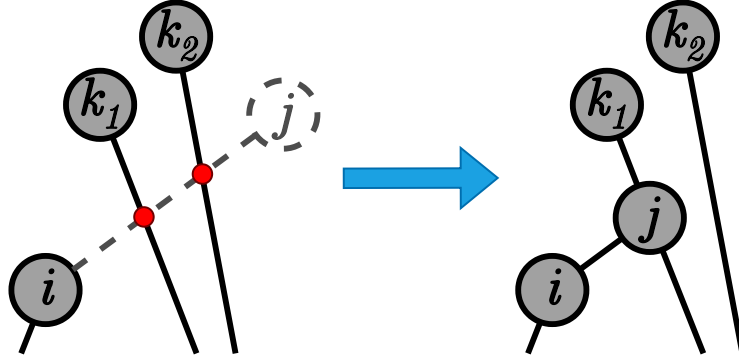

**Fig. 2** Diagram showing how check (1) turns a “bridge” into an intersection, to preserve the planar element of the city and also create a cycle. Edge  $(i, j)$  intersects with two existing edges, as shown by the red dots. The position of potential node  $j$  is therefore adjusted to the intersection which is closest to its parent  $i$ .

calculating the Euclidean distance between  $i$  and each intersection using Pythagoras’ theorem. This closest intersection point becomes the new location of node  $j$ .

Without this check the network would have many instances of roads crossing over one another (“bridges”), rather than intersections, meaning the network would not be planar. The joining of nodes onto existing edges creates cycles within the graph, making it into an inter-connected network rather than an acyclic tree.

Check (2) measures whether a potential new node  $j$  is too close to any existing node  $k$ , with this minimum allowed distance specified by an `intersectRadius` parameter which can be selected when the generator is called. The default value of this radius is 0.8 arbitrary units. If the new node  $j$  is too close to any existing node  $k$ , rather than this new node  $j$  being created, an edge will simply be made from  $i$ ,  $j$ ’s parent, to  $k$ . The workings of Check (2) are shown in Figure 3.

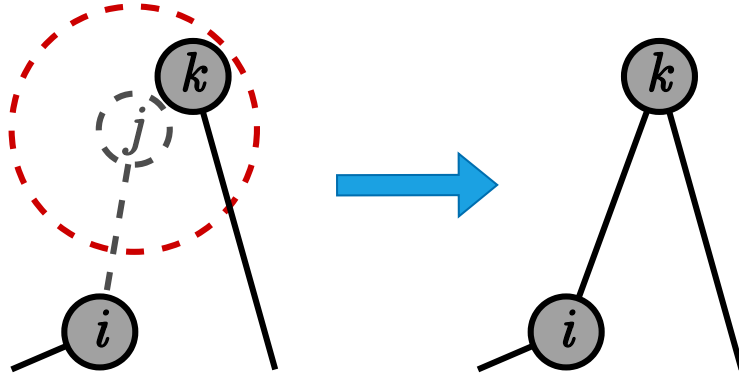

**Fig. 3** Diagram showing how check (2) prevents node overcrowding. When an existing node  $k$  is within the `intersectRadius` of a potential new node  $j$ ,  $j$  is not created and an edge is instead created from  $i$  to  $k$ . This `intersectRadius` is represented by the red circle.



This check is performed by first checking the distance between new node  $j$  and every single existing node. If one of these distances is less than the `intersectRadius`, the new node creation will be cancelled and instead an edge will be created between parent  $i$  and this node. Note that as the network becomes large, the sheer quantity of these distance calculations makes performing this check slow.

Without this check, the city would become overly dense with nodes and edges, with them being placed far closer together than is realistic. This check also boosts the inter-connectivity of the graph by creating cycles, in a similar way to Check (1).

It is important that Check (2) is still applied even if Check (1) has already moved the position of the new node. Otherwise, a node may be placed on an existing edge as a result of Check (1), but this new position may be too close to an existing node. The use of Check (2) subsequently to Check (1) would join the new node on to this existing node.

## 2 Proof that if two line segments intersect, the axis-aligned bounding boxes containing the entirety of these two lines must also intersect

Let  $AB$  and  $CD$  be two line segments in the  $xy$  plane, and  $bb_{AB}$  and  $bb_{CD}$  be the corresponding axis-aligned bounding boxes of these lines.

Assuming  $AB$  and  $CD$  intersect, there must be a point  $P$  that lies on both  $AB$  and  $CD$ .

By definition,  $bb_{AB}$  contains all of the points on the line segment  $AB$ , and similarly  $bb_{CD}$  contains all of the points on the line segment  $CD$ .

Since  $P$  lies on  $AB$ , it must fall inside  $bb_{AB}$ . Since  $P$  lies on  $CD$ , it must also fall inside  $bb_{CD}$ .

The only way  $P$  can lie in both  $bb_{AB}$  and  $bb_{CD}$  simultaneously is if  $bb_{AB}$  and  $bb_{CD}$  have an area of overlap, or an intersection.

Therefore, if two line segments intersect, their bounding boxes must also intersect.  
*QED*

## References

- [1] Dobbie, C.: CitySprout. GitHub. <https://github.com/camdobbie/CitySprout/> (2024)
- [2] Hagberg, A.A., Schult, D.A., Swart, P.J.: Exploring network structure, dynamics, and function using networkx. In: Proceedings of the 7th Python in Science Conference, pp. 11–15. SciPy, Pasadena (2008). <https://doi.org/10.25080/tcwg9851>
